# Supplementary material for: New Approaches with Different Types of Circulating Cathodic Antigen for the Diagnosis of Patients with Low Schistosoma mansoni Load
Source: PubMed Central journal article supplement (PMC3585039; doi:10.1371/journal.pntd.0002054), 2013-02-28

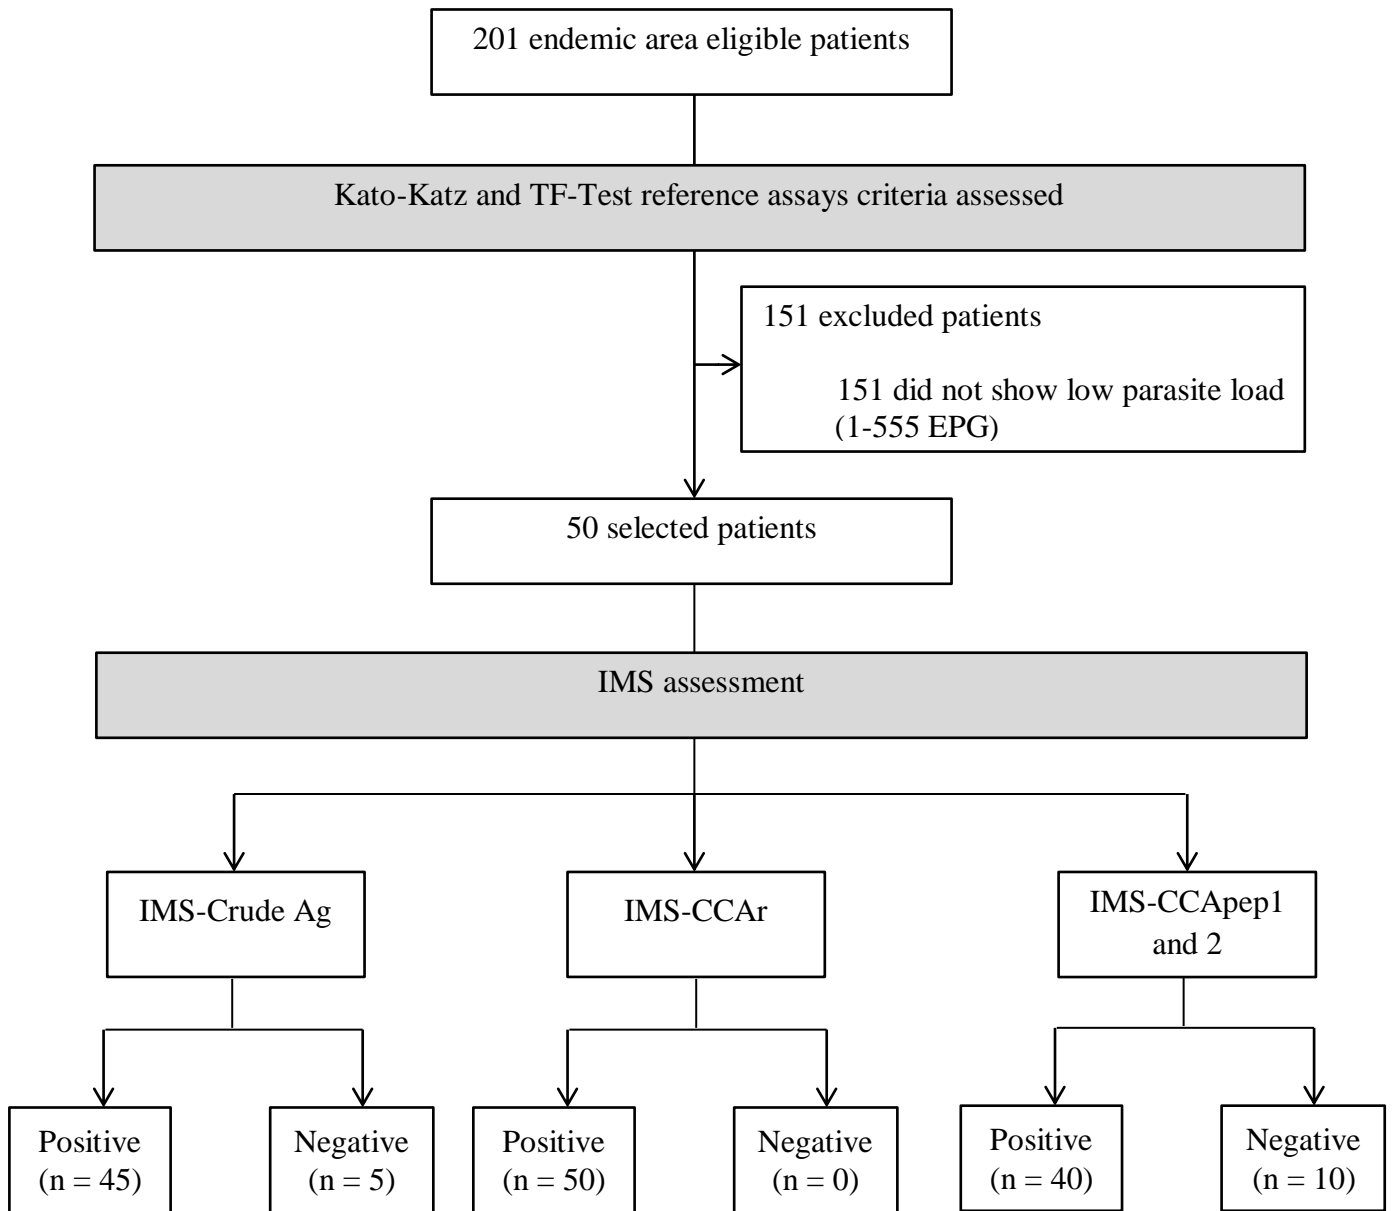

Supplement: pntd.0002054.s002.pdf [file pntd.0002054.s002.pdf]
